# Supplementary material for: CuNi/Co composites prepared by electroless deposition: structure and catalytic activity for the oxidation of cyclohexene with oxygen
Source: Royal Society of Chemistry journal article supplement (doi:10.1039/c4ra13064b), 2015-01-01
Supplement: c4ra13064b1.pdf [file c4ra13064b1.pdf]

# CuNi/Co composites prepared by electroless deposition: Structure and catalytic activity for the oxidation of cyclohexene with oxygen

Jianmin Hao\*, Xiaoli Jiao, Limin Han, Quanling Suo, Ang Ma, Jiansheng Liu, Xu Lian and

Linlin Zhang

*Chemical Engineering College, Inner Mongolia University of Technology, Hohhot 010051, P. R. China.*

*E-mail: haojmin@foxmail.com; Tel & Fax: 86-471-6575675.*

## Experimental Section

### 1. Ni-ELD/Co-5 composite preparation

In a typical synthesis, 0.7355 g Co powder (300 meshes, 99.5%), 0.2076 g  $\text{NiSO}_4 \cdot 6\text{H}_2\text{O}$  ( $\geq 99\%$ ), 1.875 g  $\text{NaH}_2\text{PO}_2 \cdot \text{H}_2\text{O}$  ( $\geq 99.0\%$ ), 1.4 g  $\text{Na}_3\text{C}_6\text{H}_5\text{O}_7 \cdot 2\text{H}_2\text{O}$  ( $\geq 99.0\%$ ) and 80 mL distilled water were added into a 250 mL round bottom flask and the pH value was adjusted to 10 with NaOH ( $\geq 96\%$ ). The reaction was allowed to continue for 1 h at 333 K under stirring. The precipitate was filtered, washed with distilled water three times and air-dried at 373 K for 3 h. The color of precipitate was gray.

### 2. CuCo-ELD/Co-5 composite preparation

In a typical synthesis, 0.7355 g Co powder (300 meshes, 99.5%), 0.192 g  $\text{CuSO}_4 \cdot 5\text{H}_2\text{O}$  ( $\geq 99\%$ ), 0.086 g  $\text{CoSO}_4 \cdot 6\text{H}_2\text{O}$  ( $\geq 99\%$ ), 1.875 g  $\text{NaH}_2\text{PO}_2 \cdot \text{H}_2\text{O}$  ( $\geq 99.0\%$ ), 1.4 g  $\text{Na}_3\text{C}_6\text{H}_5\text{O}_7 \cdot 2\text{H}_2\text{O}$  ( $\geq 99.0\%$ ) and 80 mL distilled water were added into a 250 mL round bottom flask and the pH value was adjusted to 9 with NaOH ( $\geq 96\%$ ). The reaction was allowed to continue for 1 h at 333 K under stirring. The precipitate was filtered, washed with distilled water three times and air-dried at 373 K for 3 h. The color of precipitate was changed from Co gray to Cu red.

### 3. CuNi-ELD/Al-5 composite preparation

In a typical synthesis, 0.3272 g Al powder (500 meshes, 99.9%), 0.192 g CuSO<sub>4</sub>·5H<sub>2</sub>O (≥99%), 0.08 g NiSO<sub>4</sub>·6H<sub>2</sub>O (≥98.5%), 1.875 g NaH<sub>2</sub>PO<sub>2</sub>·H<sub>2</sub>O (≥99.0%), 1.4 g Na<sub>3</sub>C<sub>6</sub>H<sub>5</sub>O<sub>7</sub>·2H<sub>2</sub>O (≥99.0%) and 80 mL distilled water were added into a 250 mL round bottom flask and the pH value was adjusted to 9.5 with NaOH (≥96%). The reaction was allowed to continue for 2 h at 333 K under stirring. The precipitate was filtered, washed with distilled water three times and air-dried at 373 K for 3 h. The color of precipitate was changed from Al silvery to Cu red.

### 4. Cu-ELD/Co-5 composite preparation

In a typical synthesis, 0.7355 g Co powder (300 meshes, 99.5%), 0.192 g CuSO<sub>4</sub>·5H<sub>2</sub>O (≥99%), 0.4 g EDTA-2Na (≥99%), 1.5 mL formaldehyde (36.7%), 2 mg 2,2'-bipyridyl (≥99.0%) and 80 mL distilled water were added into a 250 mL round bottom flask and the pH value was adjusted to 12.5 with NaOH (≥96%). The reaction was allowed to continue for 0.5 h at 333 K under stirring. The precipitate was filtered, washed with distilled water three times and air-dried at 373 K for 3 h. The color of precipitate was changed from Co gray to Cu red.

Main reactions:

Ni<sup>2+</sup> oxidizes H<sub>2</sub>PO<sub>2</sub><sup>-</sup> in alkaline condition and Ni deposition:

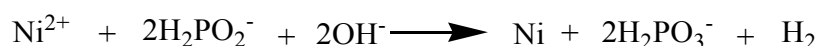

Ni replaces Cu reaction:

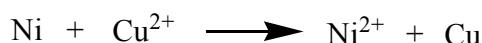

Adding above two equations:

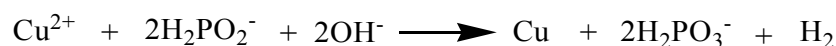

Side reactions:

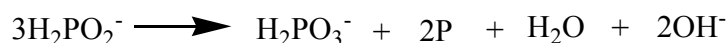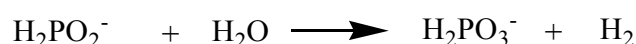

Scheme S1. The chemical equations of copper electroless deposition using sodium hypophosphite as a reducing agent and Ni<sup>2+</sup> as a catalyst.

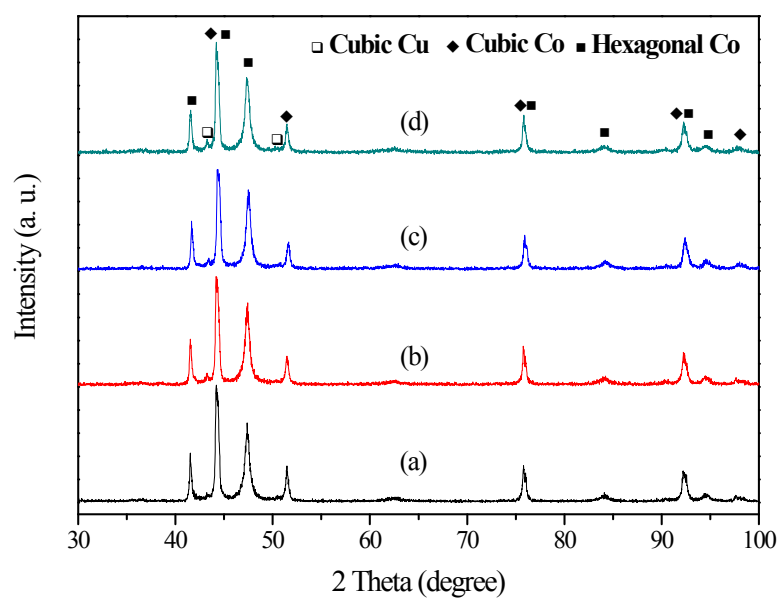

Fig. S1 XRD patterns of mixture of commercial Cu nanoparticles and Co powder: (a) 1.7 wt% Cu and 98.3 wt% Co; (b) 2.2 wt% Cu and 97.8 wt% Co; (c) 3.3 wt% Cu and 96.7 wt% Co; (d) 4.3 wt% Cu and 95.7 wt% Co.
